# Supplementary material
Source: PubMed Central journal article supplement (PMC117565)
Supplement: pnas_012605099_3.pdf [file pnas_012605099_3.pdf]

Supporting information for Fruman *et al.* (December 26, 2001) *Proc. Natl. Acad. Sci. USA*, 10.1073/pnas.012605099.

**Table 3. Coinduction of genes involved in RNA processing and translation**

| RNA Processing/Nucleolar |                                  |               | Translation   |                                           |               |
|--------------------------|----------------------------------|---------------|---------------|-------------------------------------------|---------------|
| Accession no.            | Gene description                 | Fold $\Delta$ | Accession no. | Gene description                          | Fold $\Delta$ |
| AF000938                 | RNA pol. I, large subunit        | 2.2           | (Set of 15)   | tRNA synthetases                          | 2.2--7.1      |
| D14336                   | RNA pol. I associated factor     | 2.9           | U28419        | eIF-4C                                    | 10.1          |
| D31966                   | RNA pol. I 40-kD subunit         | 3.8           | M61731        | eIF-4E                                    | 3.1           |
| W83286                   | RNA pol. I homolog               | 5.0           | AA145160      | eIF-2- $\alpha$ homolog                   | 4.9           |
| AA119191                 | RNA pol. I, II, III homolog      | 2.7           | W50532        | eIF-2- $\beta$ homolog                    | 4.8           |
| L15447                   | snRNP Rnu1a-1                    | 2.0           | W13878        | eIF-4A-like protein homolog               | 4.2           |
| M58558                   | snRNP smD                        | 2.3           | AA163902      | eIF-4A-like NUK-34 homolog                | 7.4           |
| AA108121                 | snRNP-B homolog                  | 3.1           | W29456        | eIF-4- $\gamma$ homolog                   | 3.3           |
| U85207                   | snRNP core protein Sm-X5         | 2.3           | AA104459      | eIF-4- $\gamma$ homolog                   | 7.6           |
| AA003990                 | Splicing factor SRP20<br>homolog | 3.7           | AA144693      | eIF-5 homolog                             | 4.5           |
| W87017                   | Splicing factor SF2 homolog      | 7.3           | W29849        | eIF-5 homolog                             | 5.7           |
| AA120173                 | Splicing factor U2AF<br>homolog  | 3.1           | AA108110      | eIF-5A homolog                            | 3.6           |
| W41861                   | Splicing factor SF2 homolog      | 5.9           | AA170375      | eIF-5A homolog                            | 6.0           |
| W45817                   | Splicing factor SRP75<br>homolog | 6.4           | W17411        | eIF-5A homolog                            | 3.0           |
| AA020264                 | Like RNA helicase PRP28          | -2.4          | AB003144      | eIF-2-associated 67-kD protein            | 2.9           |
| AF017153                 | RNA helicase                     | 2.1           | W71907        | Elongation factor 2 homolog               | 3.2           |
| AA068153                 | PolyA-binding protein<br>homolog | 4.7           | W70905        | Signal recognition particle<br>receptor b | 2.2           |
| W11964                   | PolyA-binding protein            | 2.2           | (set of 15)   | tRNA synthetases                          | 2.5-- 6.4     |

| RNA Processing/Nucleolar |                                                |               | Translation   |                                             |               |
|--------------------------|------------------------------------------------|---------------|---------------|---------------------------------------------|---------------|
| Accession no.            | Gene description                               | Fold $\Delta$ | Accession no. | Gene description                            | Fold $\Delta$ |
|                          | homolog                                        |               |               |                                             |               |
| AA008245                 | PolyA-binding protein<br>homolog               | 2.1           | U28419        | <i>eIF-4C</i>                               | 7.8           |
| M33212                   | Nucleolar protein NO38                         | 1.7           | AA145160      | <i>eIF-2-<math>\alpha</math> homolog</i>    | 5.0           |
| U64450                   | Nucleophosmin (Npm3)                           | 3.9           | W50532        | <i>eIF-2-<math>\beta</math> homolog</i>     | 2.8           |
| X07699                   | Nucleolin                                      | 3.0           | W70486        | <i>eIF-2-<math>\beta</math> homolog</i>     | 3.7           |
| Z22593                   | Fibrillarin                                    | 3.0           | W29920        | <i>eIF-2B-<math>\epsilon</math> homolog</i> | 2.8           |
| D14336                   | <i>RNA pol. I associated factor</i>            | 2.4           | W50904        | <i>eIF-4A homolog</i>                       | 3.3           |
| W83286                   | <i>RNA pol. I homolog</i>                      | 6.6           | AA166088      | <i>eIF-4A homolog</i>                       | 3.1           |
| AA119191                 | <i>RNA pol. I, II, III homolog</i>             | 2.4           | AA163902      | <i>eIF-4A-like NUK34 homolog</i>            | 5.5           |
| W75484                   | <i>.hnRNP A1 homolog</i>                       | 2.9           | AA144693      | <i>eIF-5 homolog</i>                        | 2.4           |
| AA154444                 | <i>snRNP smD</i>                               | 3.1           | W17411        | <i>eIF-5A homolog</i>                       | 3.3           |
| W09407                   | <i>snRNP E</i>                                 | 2.9           | AA108110      | <i>eIF-5A homolog</i>                       | 5.3           |
| W15568                   | <i>U1 snRNP-specific protein C</i>             | 2.7           | W75403        | <i>eIF-5A homolog</i>                       | 5.1           |
| AA108121                 | <i>snRNP-B homolog</i>                         | 2.8           | AA170375      | <i>eIF-5A homolog</i>                       | 5.6           |
| U85207                   | <i>snRNP core protein Sm-X5</i>                | 2.6           | AB003144      | <i>eIF-2-associated 67-kD protein</i>       | 3.0           |
| W87017                   | <i>Splicing factor SF2 homolog</i>             | 7.8           | AA110046      | <i>EF-1-<math>\gamma</math> homolog</i>     | 3.0           |
| AA003841                 | <i>Splicing factor PRP9</i><br><i>homolog</i>  | 2.4           | AA166191      | <i>EF-1-<math>\gamma</math> homolog</i>     | 4.5           |
| AA162093                 | <i>Splicing factor PRP22</i><br><i>homolog</i> | 3.0           | AA072381      | <i>EF-1-<math>\gamma</math> homolog</i>     | 5.0           |
| W41861                   | <i>Splicing factor SF2 homolog</i>             | 4.5           | AA073916      | <i>EF-1-<math>\gamma</math> homolog</i>     | 3.4           |
| AA038618                 | <i>RNA helicase T26G10</i><br><i>homolog</i>   | 4.7           | AA103340      | <i>EF-1-<math>\gamma</math> homolog</i>     | 3.4           |
| AA103933                 | <i>RNA helicase DHH1</i>                       | 2.8           | W51237        | <i>EF-1-<math>\delta</math> homolog</i>     | 3.1           |

| RNA Processing/Nucleolar |                                           |               | Translation     |                                         |               |
|--------------------------|-------------------------------------------|---------------|-----------------|-----------------------------------------|---------------|
| Accession no.            | Gene description                          | Fold $\Delta$ | Accession no.   | Gene description                        | Fold $\Delta$ |
|                          | <i>homolog</i>                            |               |                 |                                         |               |
| <i>AA038153</i>          | <i>PolyA- binding protein<br/>homolog</i> | <i>3.4</i>    | <i>AA162949</i> | <i>EF-1-<math>\delta</math> homolog</i> | <i>5.5</i>    |
| <i>AA008245</i>          | <i>PolyA- binding protein<br/>homolog</i> | <i>1.9</i>    | <i>W55283</i>   | <i>tRNA processing SEN3<br/>homolog</i> | <i>3.1</i>    |
| <i>U64550</i>            | <i>Nucleophosmin (Npm3)</i>               | <i>2.3</i>    | <i>W41880</i>   | <i>Large ribosomal subunit</i>          | <i>1.9</i>    |
| <i>X07699</i>            | <i>Nucleolin</i>                          | <i>2.5</i>    |                 |                                         |               |
| <i>Z22593</i>            | <i>Fibrillarin</i>                        | <i>2.7</i>    |                 |                                         |               |

Italics denote 12-hr data.
