# Supplementary material
Source: PubMed Central journal article supplement (PMC117565)

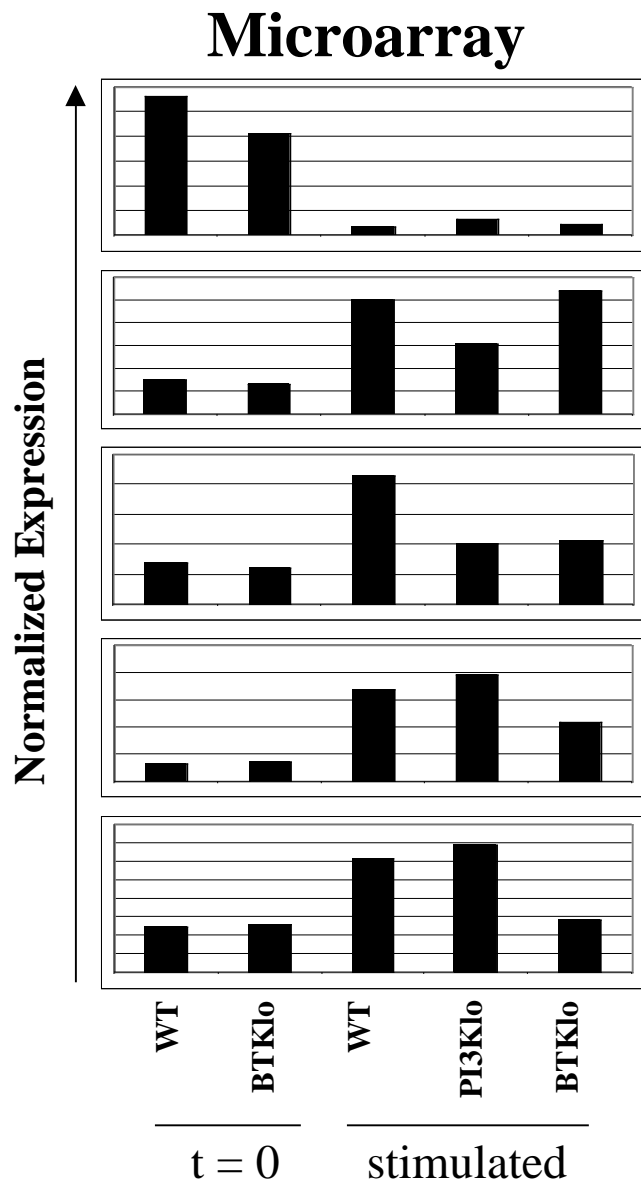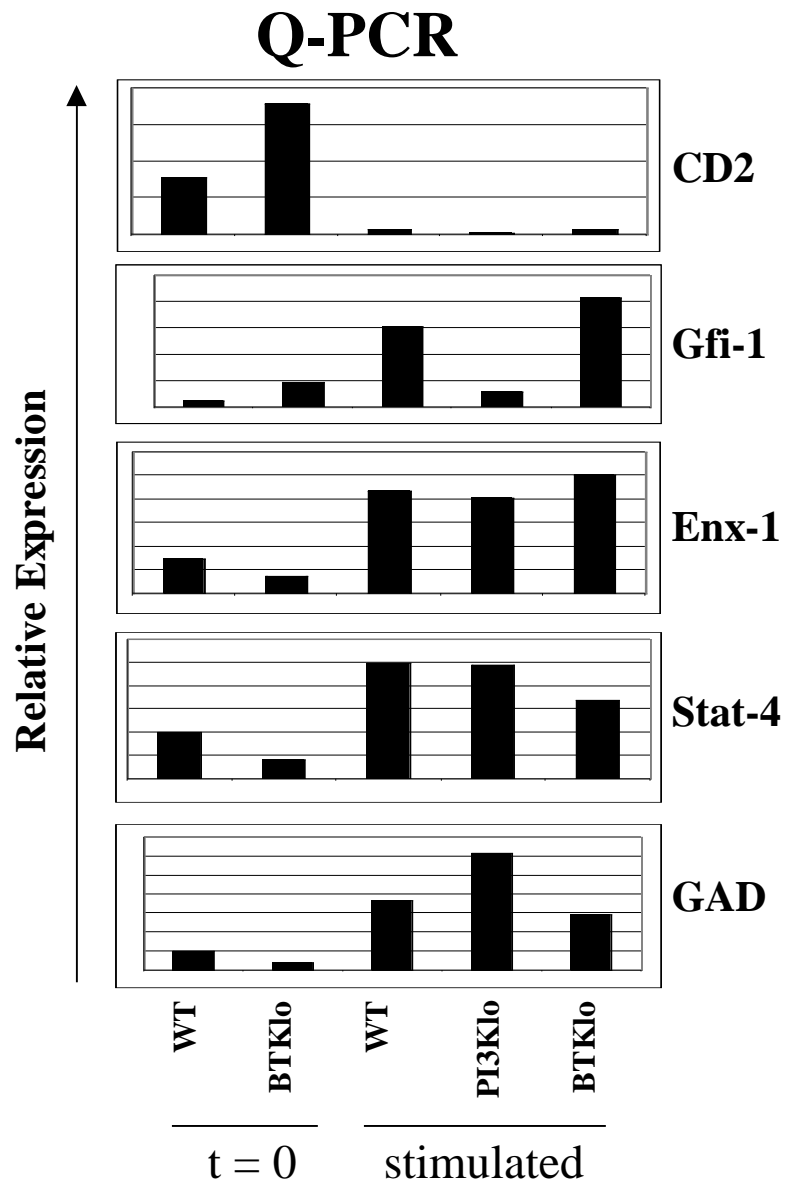

Supplement: pnas_012605099_5.pdf [file pnas_012605099_5.pdf]
